# Supplementary material for: Novel causative variants of VEXAS in UBA1 detected through whole genome transcriptome sequencing in a large cohort of hematological malignancies
Source: PubMed Central journal article supplement (PMC10169658; doi:10.1038/s41375-023-01857-5), 2023-02-23

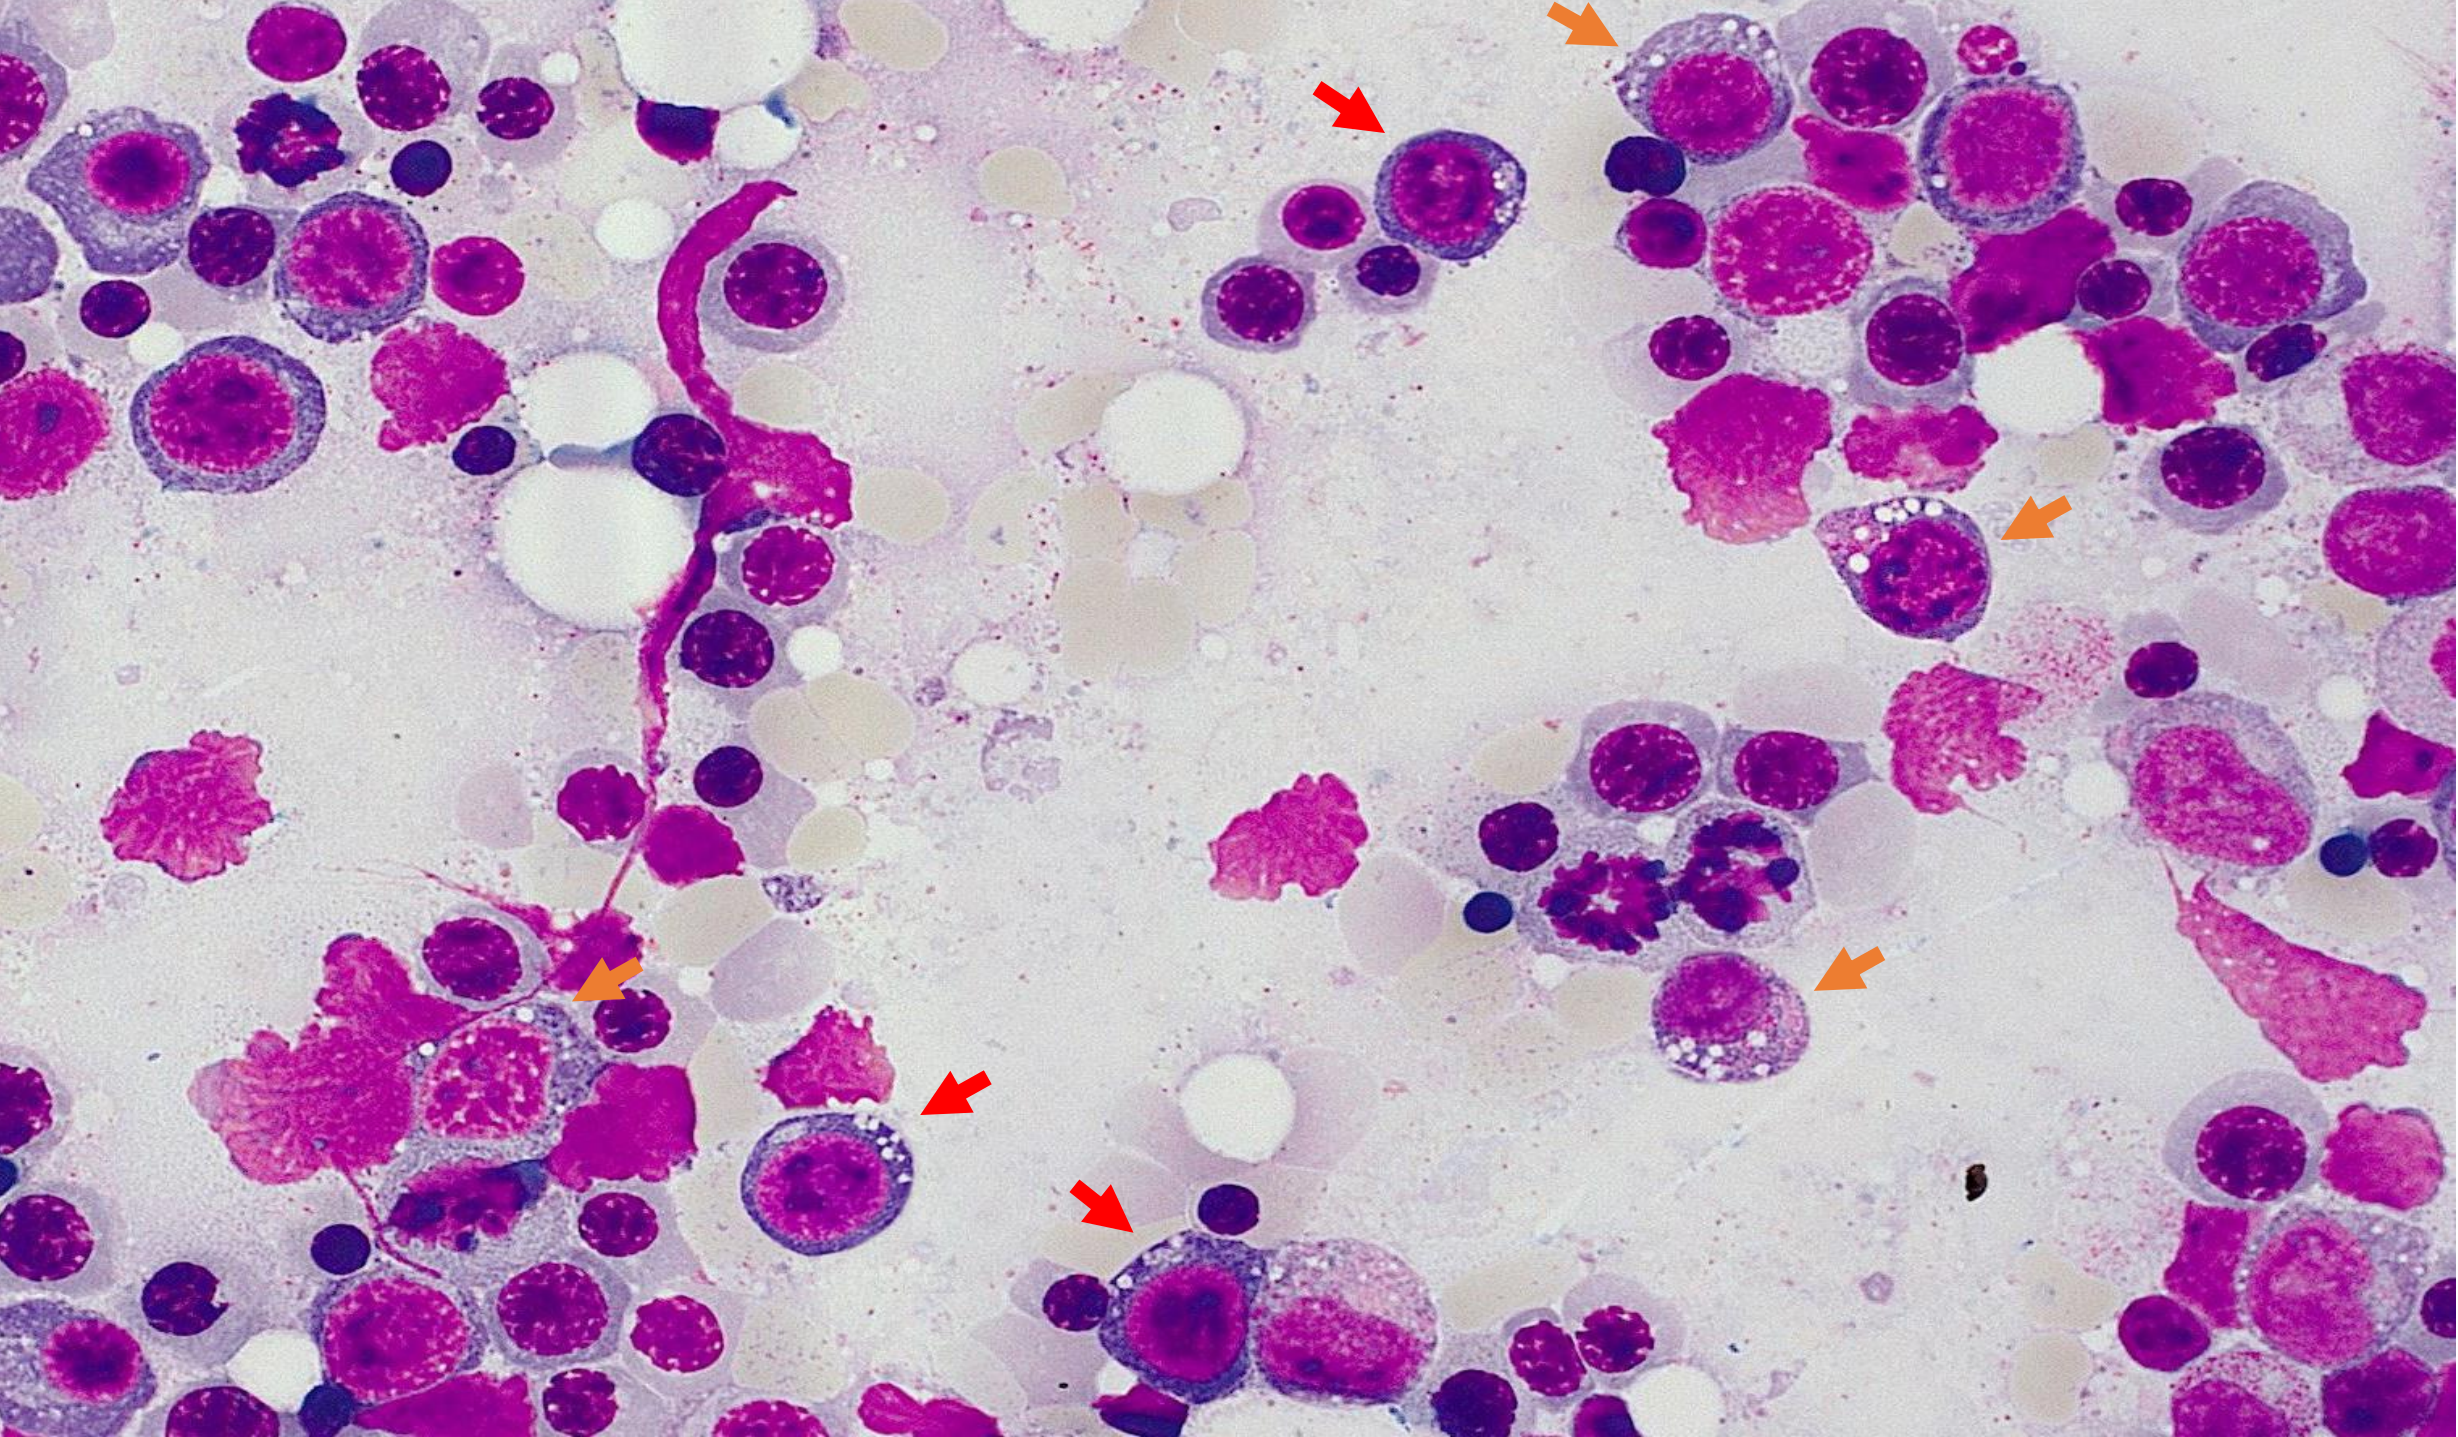

Supplement: 41375_2023_1857_MOESM6_ESM.pdf [file 41375_2023_1857_MOESM6_ESM.pdf]
